# Supplementary material for: Cloning and Molecular Characterization of CmOxdc3 Coding for Oxalate Decarboxylase in the Mycoparasite Coniothyrium minitans
Source: MDPI journal article supplement (doi:10.3390/jof8121304), 2022-12-16
Supplement: s1 [file s1]

# Cloning and Molecular Characterization of *CmOxdc3* Coding for Oxalate Decarboxylase in the Mycoparasite *Coniothyrium minitans*

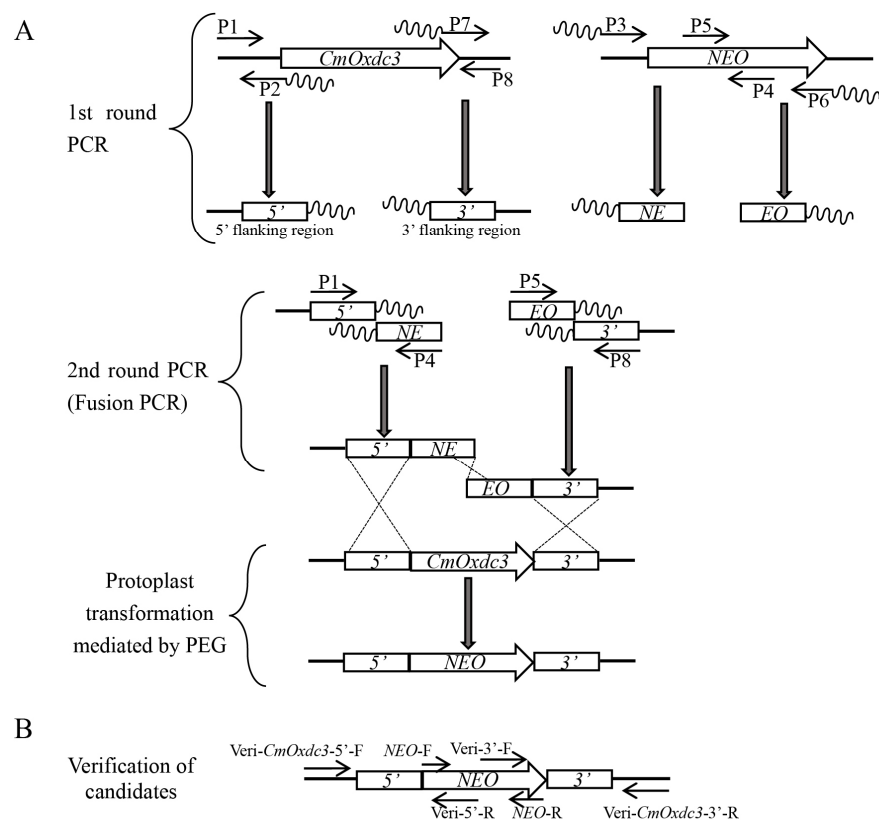

**Note:** For *CmOxdc1*, the fragments *NEO*, *NE*, *EO* and the primers *NEO-F* & *NEO-R* were changed to *HYG*, *HY*, *YG* and *HYG-F* & *HYG-R*, respectively.

**Figure S1.** Schematic diagrams showing the strategy for disruption of the oxalate decarboxylase genes in *C. minitans* (A) and the primers for PCR confirmation of the gene disruption (B).



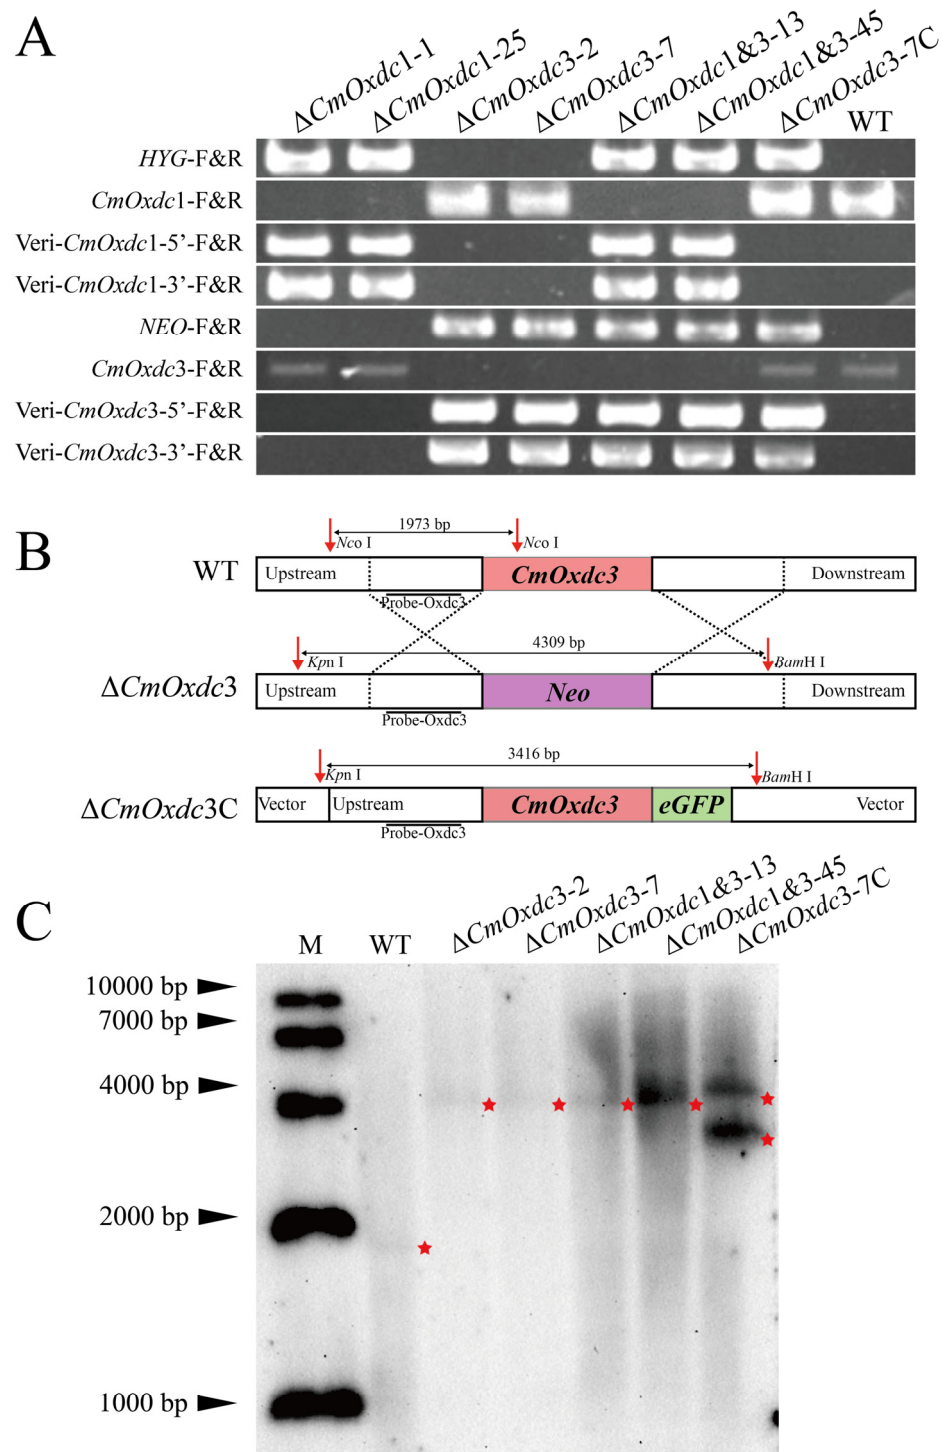

**Figure S4.** Confirmation of disruption and complementation of the oxalate decarboxylase genes *CmOxd3* and *CmOxd1* in *C. minitans*. (A) Agarose electrophoregram showing DNA bands PCR amplified from the wild type (WT) and the mutants; (B) A schematic diagram showing the strategy for Southern blotting confirmation of disruption of *CmOxd3*; (C) A Southern blotting image for confirmation of disruption of *CmOxd3*.

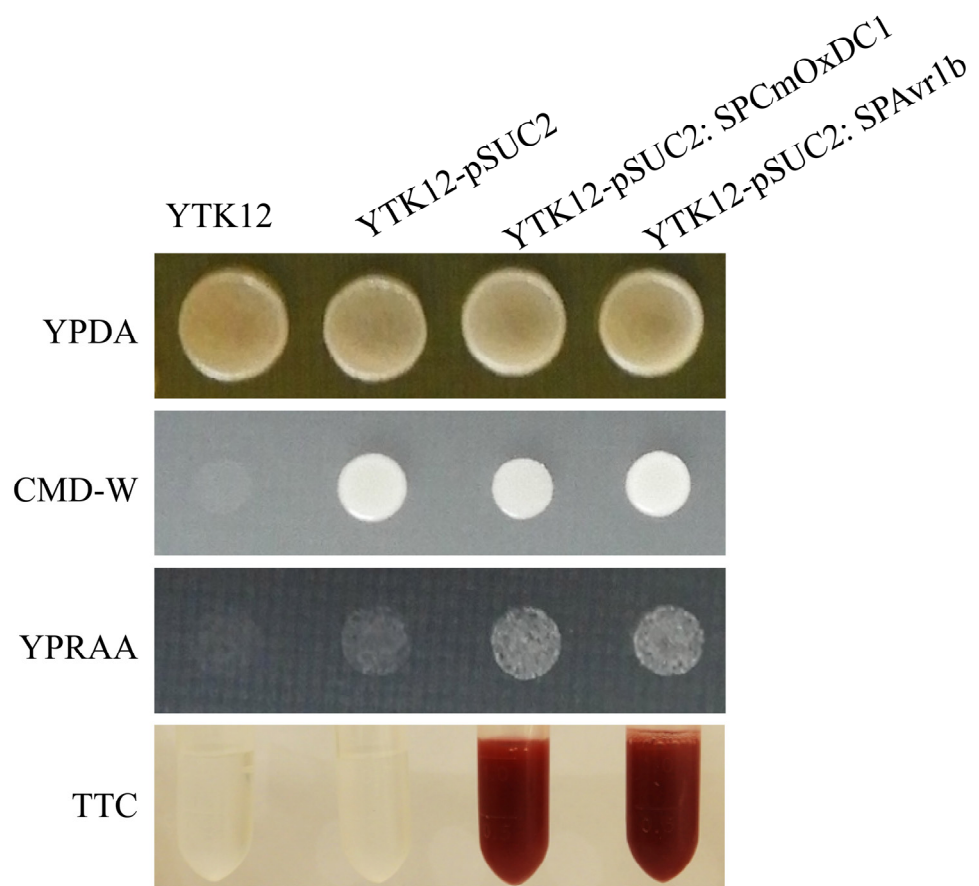

**Figure S5.** Investigation of secretory property of CmOxDC1 signal peptides by a yeast signal trap system.

**Method S1.** Yeast signal sequence trap system. To verify the predicted signal peptide of CmOxDC1 is functional or not, the yeast signal sequence trap assay was conducted as previously described [51]. The coding region of the predicted signal peptide of CmOxDC1 (17 amino acids) was amplified, and ligated into the pSUC2 vector, which contained a secretion-defective invertase gene and was digested by *EcoR* I and *Xho* I. The generated plasmid, pSUC2:SPCmOxDC1, was transformed into the yeast strain YTK12 using the lithium acetate method to yield YTK12-pSUC2:SPCmOxDC1. The positive clones with correct gene sequencing were planted on YPRAA plates for detecting invertase secretion, and further checked by the insoluble red triphenylformazan reduction from 2, 3, 5-triphenyltetrazolium chloride (TTC). The empty pSUC2 vector and the pSUC2:SPAvr1b vector were transformed into yeast strain YTK12, and the resulting strains were designated negative and positive control, respectively. All primers used in this assay are listed in Table S1.

**Table S1.** Primers used in this study

| Primer                                                      | Sequence (5' → 3')     | Purpose                                   | Notes |
|-------------------------------------------------------------|------------------------|-------------------------------------------|-------|
| <b>For fluorescence quantitative PCR (RT-qPCR) analysis</b> |                        |                                           |       |
| qRT- <i>CmActin</i> -F                                      | TCGTGACTTGACCGACTACCTC | To determine expression of <i>CmActin</i> | [16]  |
| qRT- <i>CmActin</i> -R                                      | TTGCCAATGGTGATGACCTGA  |                                           |       |
| qRT- <i>CmOxdc1</i> -F                                      | TCTCATTAACAGCTCCTACCCG | To determine expression of <i>CmOxdc1</i> | [16]  |
| qRT- <i>CmOxdc1</i> -R                                      | AGAACACAGACCAACTTCCCAT |                                           |       |
| qRT- <i>CmOxdc3</i> -F                                      | GGCAACTTCAACGAGGAGTC   | To determine expression of <i>CmOxdc3</i> | -     |
| qRT- <i>CmOxdc3</i> -R                                      | GCCAGCATCTTGTGAGTGAA   |                                           |       |

**For construction of the genetic transformation vectors and detection of *CmOxdcx***

|                                           |                                                                              |                                                                                        |                                                                                                                    |
|-------------------------------------------|------------------------------------------------------------------------------|----------------------------------------------------------------------------------------|--------------------------------------------------------------------------------------------------------------------|
| <i>CmOxdc3</i> -F                         | ATGGTTCCAGGGAGGCGAGC                                                         | Amplification of full <i>CmOxdc3</i> for gene knockout or complementation verification | -                                                                                                                  |
| <i>CmOxdc3</i> -R                         | TCACAACTCTTCCTTGTCTGCTCG                                                     |                                                                                        |                                                                                                                    |
| P1( <i>CmOxdc3</i> -5'-F)                 | CAGCAACTGGAGCGTGTACG<br>CCAGGGAAA-                                           | Amplification of upstream homologous fragment of <i>CmOxdc3</i>                        | P1( <i>CmOxdc3</i> -5'-F) and P4(Neo-R, Ne split) were used to amplify the fused fragment, <i>CmOxdc3</i> -5'-NE.  |
| P2( <i>CmOxdc3</i> -5'-R)                 | TAGCCGTTACCCATCGCGAAGAC-<br>GCGAATG                                          |                                                                                        |                                                                                                                    |
| P3( <i>CmOxdc3</i> -Ne5'-F)               | CATTTCGCGTCTTCGCGATGGATGCTCCT<br>CTTCGCTATTACGC                              | Amplification of upstream partial fragment NEO                                         |                                                                                                                    |
| P4(Neo-R, Ne split)                       | CAACGCTATGTCCTGATAGCG                                                        |                                                                                        |                                                                                                                    |
| P5(Neo-F, oR split)                       | CCTGTCATCTCACCTTGCTC<br>CGCGTCGCAATGCGATGGTACGG-                             | Amplification of downstream partial fragment NEO                                       | P5(Neo-F, oR split) and P8( <i>CmOxdc3</i> -3'-R) were used to amplify the fused fragment, EO- <i>CmOxdc3</i> -3'. |
| P6( <i>CmOxdc3</i> -oR3'-R)               | CATAGTGCGTGTTTATGC                                                           |                                                                                        |                                                                                                                    |
| P7( <i>CmOxdc3</i> -3'-F)                 | GCATAAACACGCACTATGCCGTAC-<br>CATCGCATTGCGACGCG                               | Amplification of downstream homologous fragment of <i>CmOxdc3</i>                      |                                                                                                                    |
| P8( <i>CmOxdc3</i> -3'-R)                 | CACTGCTACTGCCGTTGGAG                                                         |                                                                                        |                                                                                                                    |
| Veri- <i>CmOxdc3</i> -5'-F                | TGGAGCACTCTCGATGTGAC                                                         | PCR validation for upstream homologous recombination of <i>CmOxdc3</i>                 | -                                                                                                                  |
| Veri-Neo-5'-R                             | GTCACATCGAGAGTGCTCCA                                                         |                                                                                        |                                                                                                                    |
| Veri-Neo-3'-F                             | GCACGTAAAGTGCCAAAGGC                                                         | PCR validation for downstream homologous recombination of <i>CmOxdc3</i>               | -                                                                                                                  |
| Veri- <i>CmOxdc3</i> -3'-R                | CACCAGTGGCACTACCATTG                                                         |                                                                                        |                                                                                                                    |
| NEO-F                                     | ATGATTGAACAAGATGGATTGCACGC                                                   | Amplification of full NEO for gene knockout verification                               | -                                                                                                                  |
| NEO-R                                     | TCAGAAGAACTCGTCAAGAAGGC                                                      |                                                                                        |                                                                                                                    |
| Pa( <i>Kpn</i> I-Sktn- <i>CmOxdc3</i> )-F | agggaacaaaagctgggtaccTGCAG-<br>CAGCGGTCCATAGTG ( <i>Kpn</i> I-site in bold)  | Amplification of 5' flank and coding sequence (without stop codon) of <i>CmOxdc3</i>   | To construct the complementation vector pSKTH- <i>Oxdc3</i> -eGFP                                                  |
| Pb( <i>CmOxdc3</i> -eG)-R                 | tgctcacatCAACTCTTCCTTGTCTGCTCG                                               |                                                                                        |                                                                                                                    |
| Pc( <i>CmOxdc3</i> -eGFP)-F               | ggaagagttgATGGTGAGCAAGGGCGAGG<br>caggaattcgatatcaagctt-                      | Amplification of full <i>eGFP</i> from the plasmid pCHEG                               |                                                                                                                    |
| Pd( <i>eGFP</i> -Sktn- <i>Hind</i> III)-R | GTACAGCTCGTCCATGCCGA ( <i>Hind</i> III-site in bold)                         |                                                                                        |                                                                                                                    |
| SKTH-HYG-F                                | cgcggtggcgccgctctagaCTG-<br>CAGCCCAACTGATATTGAA ( <i>Xba</i> I-site in bold) | Amplification of full <i>HYG</i> cassette from the vector pBluscrikp II KS1004         |                                                                                                                    |
| SKTH-HYG-R                                | actgaggaatccgcttctagaACTAGTG-<br>GATCCCCCAACTGG ( <i>Xba</i> I-site in bold) |                                                                                        |                                                                                                                    |
| HYG-F                                     | ATGAAAAAGCCTGAACTCACCGC                                                      | Amplification of full <i>HYG</i> for gene knockout or complementation verification     | -                                                                                                                  |
| HYG-R                                     | CTATTCCTTTGCCCTCGGAC                                                         |                                                                                        |                                                                                                                    |
| Psb- <i>Cmoxdc3</i> -R                    | CCATCGCGAAGACGCGAATG                                                         | Combine with P1( <i>CmOxdc3</i> -5'-F) to clone Probe-oxdc3 for Southern blotting      | -                                                                                                                  |

|                                                                    |                                                                                           |                                                                           |                                                                                                                     |
|--------------------------------------------------------------------|-------------------------------------------------------------------------------------------|---------------------------------------------------------------------------|---------------------------------------------------------------------------------------------------------------------|
| <i>CmOxdc1</i> -F                                                  | ATGAAGGCCTTCCAAGCATCG                                                                     | Amplification of full                                                     |                                                                                                                     |
| <i>CmOxdc1</i> -R                                                  | TCACAAAGTGTTCCCTGTGAAG                                                                    | <i>CmOxdc1</i> for gene knockout verification                             | -                                                                                                                   |
| P1( <i>CmOxdc1</i> -5'-F)                                          | CGTGCCTTAACACTTACGAGG                                                                     | Amplification of upstream                                                 | P1( <i>CmOxdc1</i> -5'-F) and P4(HY5'-R, HY split) were used to amplify the fused fragment, <i>CmOxdc1</i> -5'-HY.  |
| P2( <i>CmOxdc1</i> -5'-R)                                          | CTCCACTAGCTCCAGCCAAGGAGGA-GATTCCGAACGAAGC                                                 | homologous fragment of <i>CmOxdc1</i>                                     |                                                                                                                     |
| P3( <i>CmOxdc1</i> -HY5'-F)                                        | GCTTCGTTTCGGAATCTCCTCCTTGGCTG-GAGCTAGTGGAG                                                | Amplification of upstream partial fragment                                | HYG                                                                                                                 |
| P4(HY5'-R, HY split)                                               | GGATGCCTCCGCTCGAAGTA                                                                      |                                                                           |                                                                                                                     |
| P5(HY3'-F, YG split)                                               | CGTTGCAAGACCTGCCTGAA                                                                      | Amplification of down-stream partial fragment                             | P5(HY3'-F, YG split) and P8( <i>CmOxdc1</i> -3'-R) were used to amplify the fused fragment, YG- <i>CmOxdc1</i> -3'. |
| P6( <i>CmOxdc1</i> -YG3'-R)                                        | CCTTCTCACCCATCTGCCTTC-TATTCCTTTGCCCTCGGAC                                                 | HYG                                                                       |                                                                                                                     |
| P7( <i>CmOxdc1</i> -3'-F)                                          | GTCCGAGGGCAAAGGAA-TAGAAGGCAGATGGGTGAGAAGG                                                 | Amplification of down-stream homologous fragment of <i>CmOxdc1</i>        |                                                                                                                     |
| P8( <i>CmOxdc1</i> -3'-R)                                          | GGTAACGATGGTTCCTAACTGC                                                                    |                                                                           |                                                                                                                     |
| Veri- <i>CmOxdc1</i> -5'-F                                         | GTCCGATCTACCATGCTTTGC                                                                     | PCR validation for upstream homologous recombination of <i>CmOxdc1</i>    | -                                                                                                                   |
| Veri-HYG-5'-R                                                      | AAGAGTCACACTTCGAGCGC                                                                      |                                                                           |                                                                                                                     |
| Veri-HYG-3'-F                                                      | GCAATTTTCGATGATGCAGCTTGG                                                                  | PCR validation for down-stream homologous recombination of <i>CmOxdc1</i> | -                                                                                                                   |
| Veri- <i>CmOxdc1</i> -3'-R                                         | CTATGCGTTGAAAACTCTCGTC                                                                    |                                                                           |                                                                                                                     |
| <b>For verification of the secretory signal peptide of CmOxDC1</b> |                                                                                           |                                                                           |                                                                                                                     |
| pSUC2-F                                                            | TTTGTTTCCTCGTCATTGTTCTCG                                                                  | For PCR detection of recombinant vector pSUC2                             | -                                                                                                                   |
| pSUC2-R                                                            | CAGCCCTTGTTGGGTGTGAA                                                                      |                                                                           |                                                                                                                     |
| pS-Ox1- <i>Eco</i> R1-F                                            | cggaattttaattaa-<br><b>gaattc</b> ATGAAGGCCTTCCAAGCATCG<br>( <i>Eco</i> R I-site in bold) | For construction vector pSUC2-SPCmOxDC1                                   | -                                                                                                                   |
| pS-Ox1- <i>Xho</i> 1-R                                             | cactataggagaac <b>ctcgag</b> AC-<br>CTGAATTTCCACAGGAAGAAGC ( <i>Xho</i> I-site in bold)   |                                                                           | -                                                                                                                   |

**Table S2.** Sequences of 39 OXDCs to construct phylogenetic tree

| Species                       | Gene ID or symbol | Length of predicted signal peptides |
|-------------------------------|-------------------|-------------------------------------|
| <i>Aspergillus nidulans</i>   | XP_681368         | 22                                  |
|                               | XP_661167         | 17                                  |
| <i>Aspergillus oryzae</i>     | XP_001827593      | 17                                  |
|                               | XP_001817196      | None                                |
| <i>Bacillus licheniformis</i> | AAU25032          | None                                |
|                               | AAU42403          | None                                |
| <i>Bacillus subtilis</i>      | CAA11727, BsOxDC  | None                                |
|                               | CAB13759          | None                                |
| <i>Beauveria bassiana</i>     | XP_008594973      | 22                                  |
|                               | XP_008600951      | 19                                  |

|                                     |                   |      |
|-------------------------------------|-------------------|------|
|                                     | XP_008602434      | 16   |
| <i>Coniothyrium minitans</i>        | AFD29300, CmOxDC1 | 17   |
|                                     | AFD29301, CmOxDC2 | 18   |
|                                     | QNH91388, CmOxDC3 | None |
|                                     |                   |      |
| <i>Coprinopsis cinerea</i>          | XP_001836638      | 19   |
| <i>Dichomitus squalens</i>          | CAV19809          | 20   |
| <i>Flammulina velutipes</i>         | AAF13275, FvOxDC  | 20   |
| <i>Fusarium graminearum</i>         | XP_011325242      | 18   |
|                                     | XP_011326230      | 22   |
| <i>Ktedonobacter racemifer</i>      | WP_007907963      | None |
|                                     | WP_007920807      | None |
|                                     | WP_007917760      | None |
|                                     | WP_007922231      | None |
| <i>Magnaporthe oryzae</i>           | XP_016846033      | 19   |
|                                     | XP_003721495      | 16   |
| <i>Neurospora crassa</i>            | XP_964781         | None |
| <i>Paraphaeosphaeria sporulosa</i>  | XP_018036668      | 17   |
|                                     | XP_018039273      | 18   |
|                                     | XP_018031961      | 18   |
| <i>Parastagonospora nodorum</i>     | XP_001804015      | None |
|                                     | XP_001800771      | 18   |
|                                     | XP_001792378      | 17   |
| <i>Pyrenophora tritici-repentis</i> | XP_001931967      | None |
|                                     | XP_001933966      | 17   |
| <i>Sclerotinia sclerotiorum</i>     | XP_001588349      | 22   |
|                                     | XP_001590050      | 22   |
| <i>Trichoderma harzianum</i>        | KKP05720          | 20   |
|                                     | KKP07814          | 18   |
|                                     | KKP05490          | 18   |
